# Supplementary material for: Facile Fabrication of Hybrid Carbon Nanotube Sensors by Laser Direct Transfer
Source: MDPI journal article supplement (doi:10.3390/nano11102604), 2021-10-03
Supplement: s1 [file s1]

# Facile Fabrication of Hybrid Carbon Nanotube Sensors by Laser Direct Transfer

Anca F. Bonciu <sup>1,2</sup>, Mihaela Filipescu <sup>1</sup>, Stefan I. Voicu <sup>3,4</sup>, Thomas Lippert <sup>5,6</sup>, Alexandra Palla-Papavlu <sup>1,\*</sup>

<sup>1</sup> National Institute for Lasers, Plasma and Radiation Physics, Lasers Department, Atomistilor 409, 077125, Magurele, Romania;

<sup>2</sup> Faculty of Physics, University of Bucharest, Atomistilor 409, 077125, Magurele, Romania

<sup>3</sup> University Politehnica of Bucharest, Department of Analytical and Environmental Chemistry, 1-7 Gh. Polizu Str., 011061, Bucharest, Romania

<sup>4</sup> Advanced Polymer Materials Group, University Politehnica of Bucharest, 1-7 Gh. Polizu Str., 011061, Bucharest, Romania

<sup>5</sup> Laboratory of Inorganic Chemistry, Department of Chemistry and Applied Biosciences, ETH Zurich, 8093 Zurich, Switzerland

<sup>6</sup> Laboratory of Multiscale Materials Experiments, Paul Scherrer Institute, 5232 Villigen, Switzerland

\* Correspondence: Alexandra.papavlu@inflpr.ro

We have calculated the theoretical detection limit (LOD) as previously reported [1] from the signal/noise ratio. First, we took 13 data points at the baseline before NH<sub>3</sub> exposure (y<sub>i</sub>) and plotted the data using a fifth order polynomial fit.

**Citation:** Bonciu, A.F.; Filipescu, M.; Voicu, S.I.; Lippert, T.; Palla-Papavlu, A. Facile Fabrication of Hybrid Carbon Nanotube Sensors by Laser Direct Transfer. *Nanomaterials* **2021**, *11*, 2604. <https://doi.org/10.3390/nano11102604>

Academic Editor: Johannes Heitz

Received: 13 September 2021

Accepted: 1 October 2021

Published: 3 October 2021

**Publisher's Note:** MDPI stays neutral with regard to jurisdictional claims in published maps and institutional affiliations.

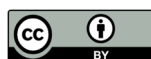

**Copyright:** © 2021 by the authors. Licensee MDPI, Basel, Switzerland. This article is an open access article distributed under the terms and conditions of the Creative Commons Attribution (CC BY) license (<http://creativecommons.org/licenses/by/4.0/>).

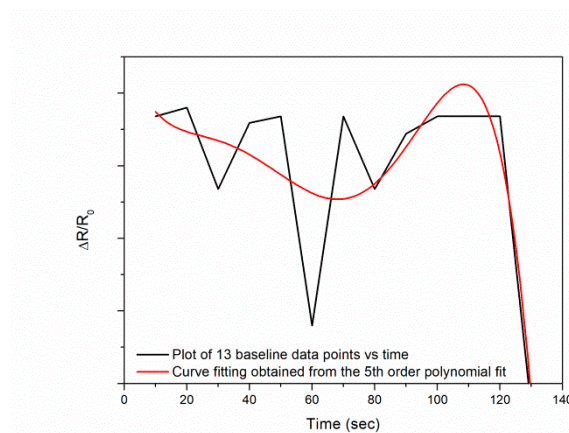

**Figure S1.** Calculation of the theoretical detection limit.

From the curve-fitting equation we obtained the statistical parameters of the polynomial fit (y), and then calculated the sensor noise using the root-mean-square deviation (Eq. 1).

$$\text{Eq. (1) } \text{rms}_{\text{noise}} = \sqrt{\sum (y_i - y)^2 / N}$$

$$\sqrt{\sum (y_i - y)^2} = 1.23639 \times 10^{-8}$$

N=13, where N is the number of data points in the curve fitting.

The  $\text{rms}_{\text{noise}}$  for the SWCNT@SnO<sub>2</sub> sensor is  $7.09599 \times 10^{-5}$ .

The theoretical detection limit according to IUPAC is

Eq. (2)  $LOD = 3 \times rms_{noise} / \text{slope}$ .

The slope is 0.00164 (obtained from the calibration curve of the sensor response)

$LOD = 23.93 \text{ ppt}$

### References

1. Ammu, S.; Dua, V.; Agnihotra, S.R.; Surwade, S.P.; Phulgirkar, A.; Patel, S.; Manohar, S.K. Flexible, All-Organic Chemiresistor for Detecting Chemically Aggressive Vapors. *J. Am. Chem. Soc.* **2012**, *134*, 4553–4556, doi:10.1021/ja300420t.
